# Supplementary material for: Electric Fields at Breast Cancer and Cancer Cell Collective Galvanotaxis
Source: PubMed Central journal article supplement (PMC7250931; doi:10.1038/s41598-020-65566-0), 2020-05-26
Supplement: 41598_2020_65566_MOESM1_ESM.pdf [file 41598_2020_65566_MOESM1_ESM.pdf]

# Electric Fields at Breast Cancer and Cancer Cell Collective Galvanotaxis

Kan Zhu<sup>1</sup>, Nicholas R. Hum<sup>2,3</sup>, Brian Reid<sup>1</sup>, Qin Sun<sup>1,4</sup>,  
Gabriela G. Loots<sup>2,3\*</sup>, and Min Zhao<sup>1\*</sup>

<sup>1</sup> Institute for Regenerative Cures, Departments of Dermatology, Department of Ophthalmology & Vision Science, School of Medicine, University of California, Davis, CA 95616

<sup>2</sup> Physical and Life Sciences Directorate, Lawrence Livermore National Laboratory, Livermore, CA 94550

<sup>3</sup>University of California, Merced, School of Natural Sciences, Merced, CA.

<sup>4</sup> School of Life Science, Yunnan Normal University, Yunnan, China

\* **Correspondence:** MZ ([minzhao@ucdavis.edu](mailto:minzhao@ucdavis.edu)) or GGL ([loots1@llnl.gov](mailto:loots1@llnl.gov))

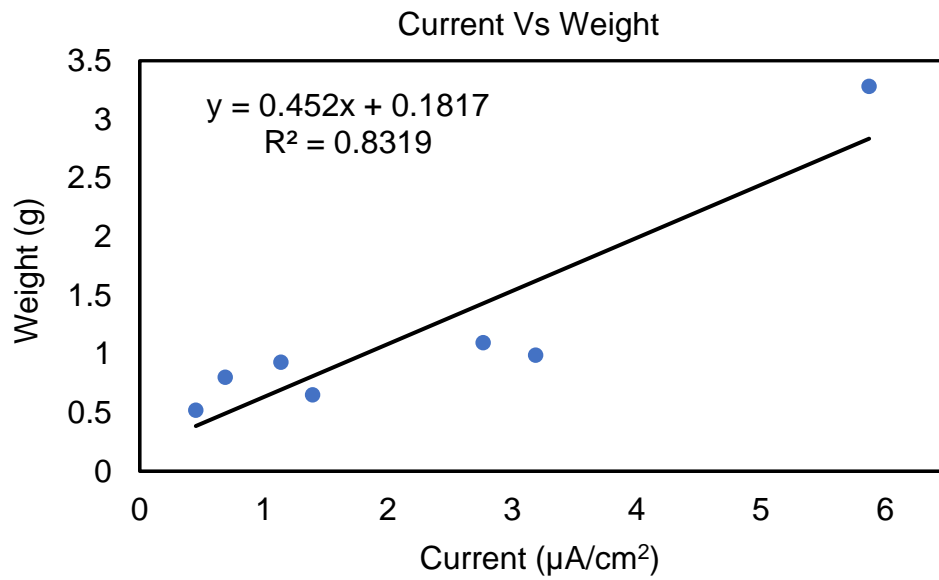

**sFig. 1. Correlation between Tumor weight (size) and electric current density.** Compilation of all tumors tested. Data of current magnitude are from Fig. 1d. Solid line: linear regression ( $r^2=0.8319$ ); r: correlation coefficient ( $P=0.0042$ ).

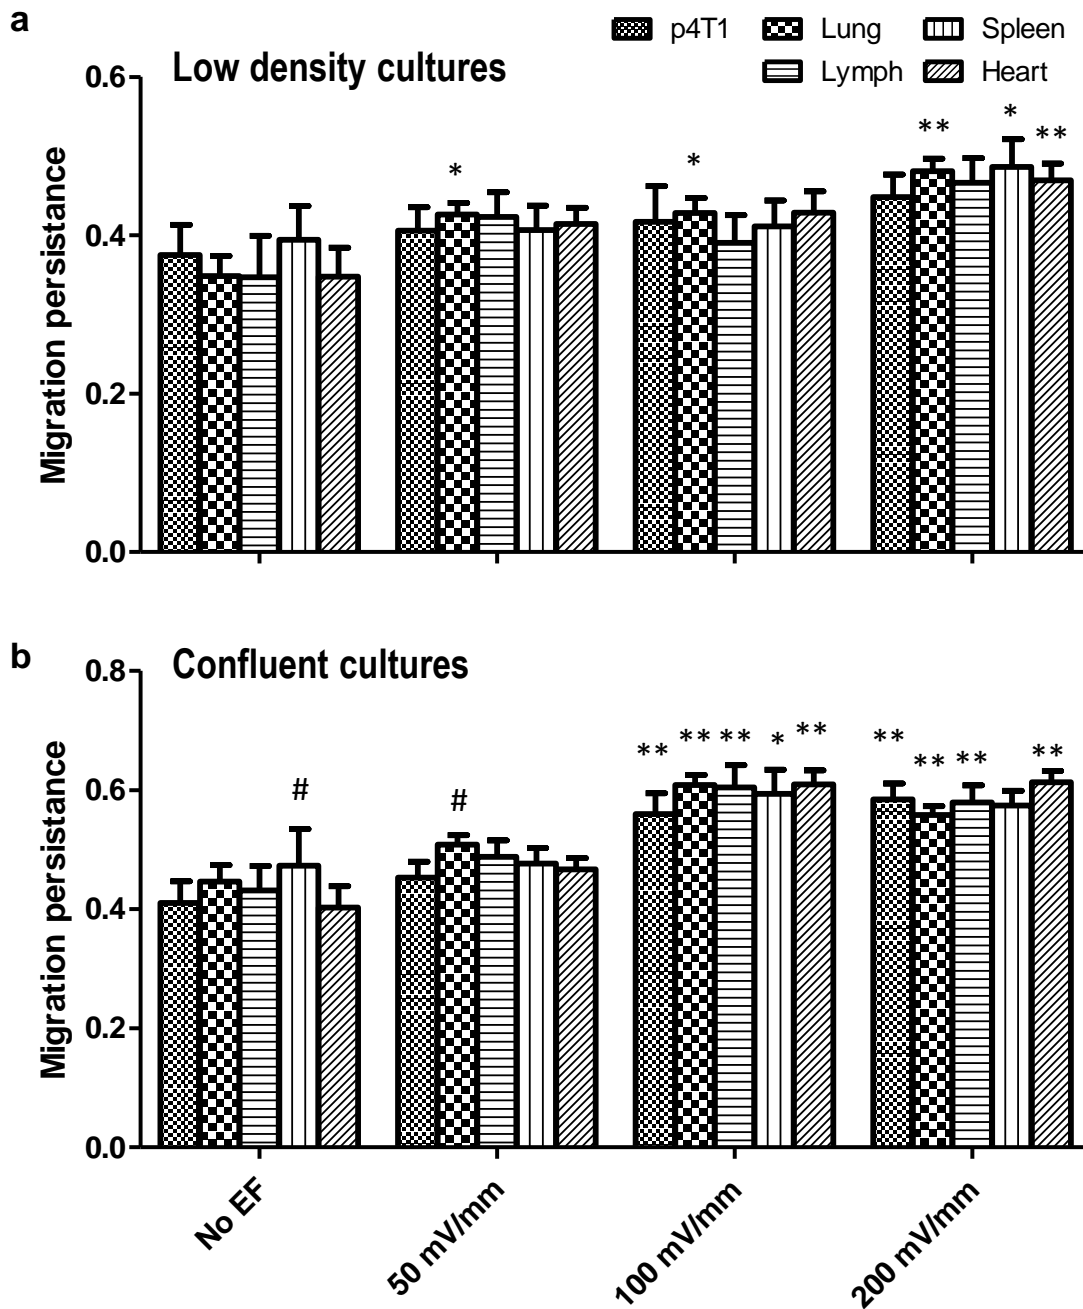

**sFig. 2. Migration persistence of metastatic sublines in EFs.** (a) Cells in isolation; (b) Cells in monolayer. At least 50 cells were analyzed for each condition. Data are shown as mean  $\pm$  s.e.m. \*  $p < 0.05$ , \*\*  $p < 0.01$  compared with its no EF control; #  $p < 0.05$ , ##  $p < 0.01$  compared with parental 4T1 cells of the same condition.

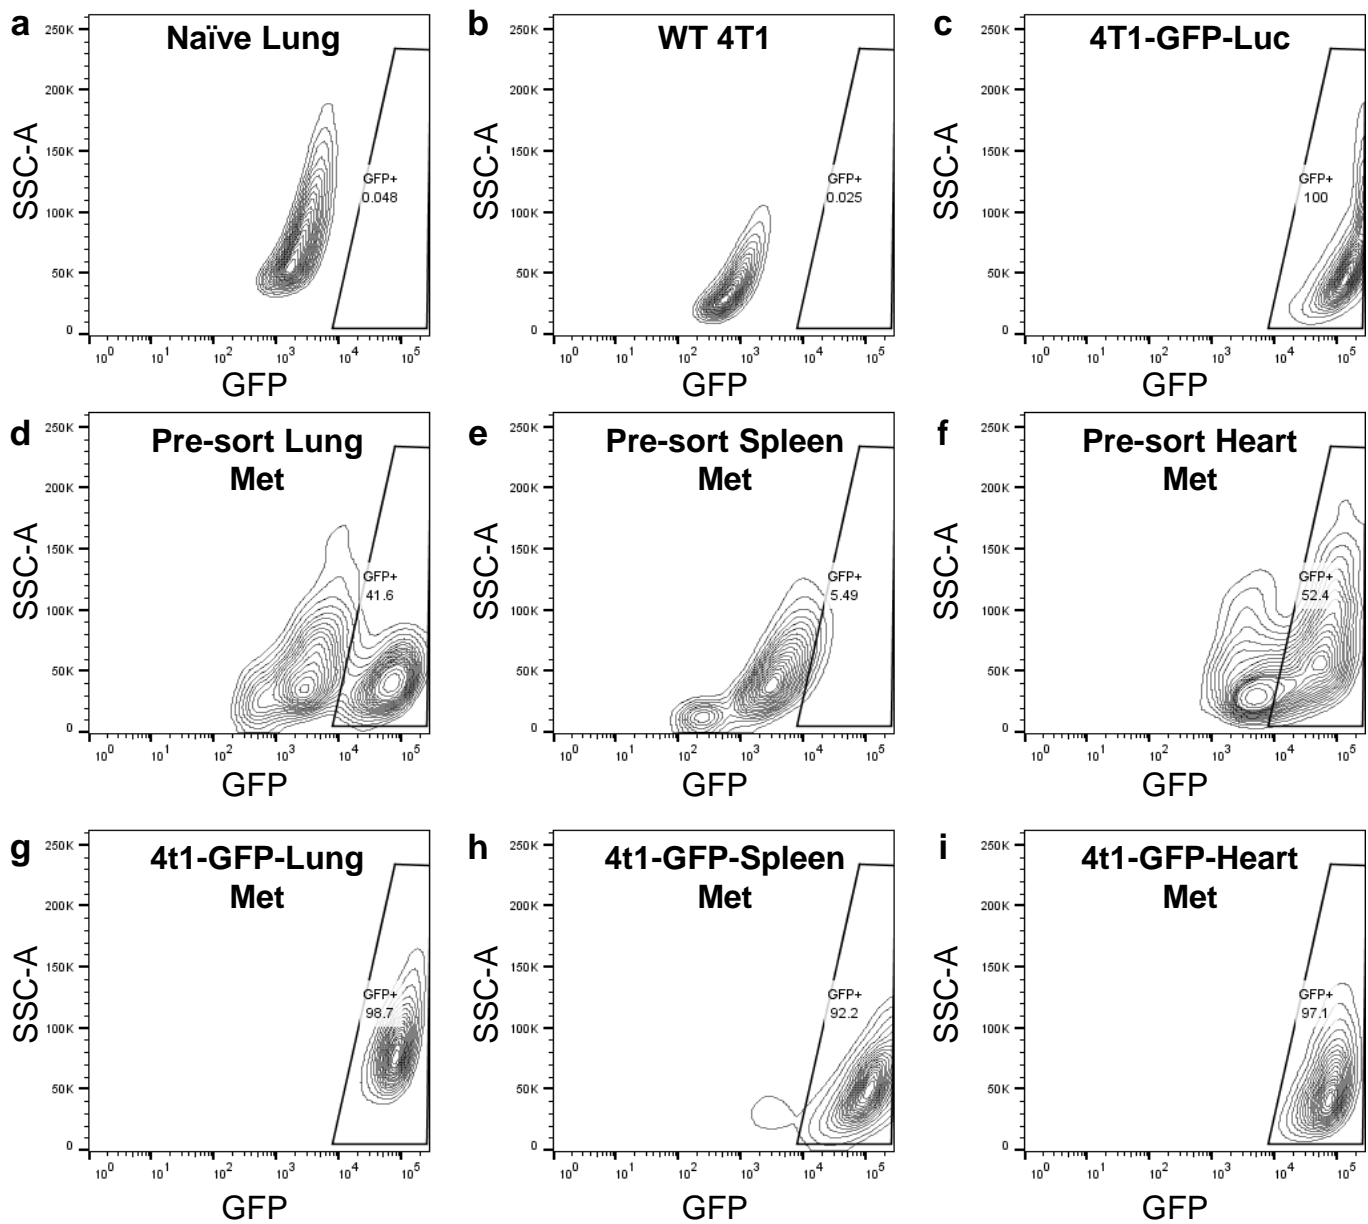

**sFig 3. 4T1-GFP metastatic subline generation.** Cytometric analysis of GFP intensity of (a) naïve lung tissue, (b) WT 4T1, (c) 4T1-GFP-Luc in culture, (d-f) primary cell populations from tissues of interest, (g-i) established metastatic cell lines following 2 FACS isolations
